# Supplementary material for: Prevalent pH Controls the Capacity of <em>Galdieria maxima</em> to Use Ammonia and Nitrate as a Nitrogen Source
Source: Preprints.org preprint supplement (doi:10.20944/preprints201910.0092.v1), 2019-10-08
Supplement: Supplementary file 14 [file supplementary]

| <b>Taxa</b>             | <b>Collection site</b>    | <b>Strain Voucher</b> | <b>Accession Number</b> |
|-------------------------|---------------------------|-----------------------|-------------------------|
| <i>Galdieria maxima</i> | Kunashir (Russia)         | IPPAS P507            | AY391370                |
|                         | Landmannalaugar (Iceland) | ACUF551               | MK394995                |
|                         |                           | ACUF419               | KC883840                |
|                         |                           | ACUF420               | KC883841                |
|                         |                           | ACUF421               | KC883842                |
|                         |                           | ACUF428               | KC883848                |
|                         |                           | ACUF449               | KC883861                |
|                         |                           | ACUF450               | KC883862                |
|                         |                           | ACUF456               | KC883868                |
|                         |                           | ACUF457               | KC883869                |
|                         |                           | ACUF458               | KC883870                |
|                         |                           | ACUF451               | KC883863                |
|                         | Seltun (Iceland)          | ACUF389               | KC883816                |
|                         |                           | ACUF393               | KC883819                |
|                         |                           | ACUF396               | KC883821                |
|                         |                           | ACUF425               | KC883846                |
|                         |                           | ACUF436               | KC883849                |
|                         |                           | ACUF468               | KC883880                |
|                         |                           | ACUF469               | KC883881                |
|                         |                           | ACUF411               | KC883833                |
|                         | Niasjvellir (Iceland)     | ACUF404               | KC883827                |
|                         | Güçlükonak (Turkey)       | ACUF769               | KX501179                |
|                         |                           | ACUF722               | KX501174                |
|                         |                           | ACUF660               | KY033404                |
|                         |                           | ACUF710               | KX501173                |
|                         |                           | ACUF697               | KY033415                |
|                         | Diyadin (Turkey)          | cloneT18              | KX501185                |
|                         |                           | ACUF773               | KX501180                |
|                         |                           | ACUF665               | KY033406                |
|                         |                           | ACUF774               | KY033436                |
|                         |                           | cloneT06              | KY033453                |
|                         |                           | ACUF772               | KY033435                |
|                         | Manisa Kula (Turkey)      | ACUF648               | KY033397                |
|                         |                           | ACUF731               | KY033420                |
|                         |                           | ACUF671               | KY033410                |
|                         |                           | ACUF743               | KY033428                |
|                         |                           | ACUF777               | KY033439                |
|                         |                           | ACUF776               | KY033438                |
|                         | Germencik (Turkey)        | cloneT15              | KX501183                |
|                         |                           | ACUF673               | KY033411                |
|                         |                           | ACUF739               | KY033425                |
|                         |                           | ACUF742               | KY033427                |
|                         | Cermick (Turkey)          | ACUF647               | KY033396                |
|                         |                           | cloneT03              | KY033450                |

|                                  |                                 |           |          |
|----------------------------------|---------------------------------|-----------|----------|
|                                  |                                 | cloneT04  | KY033451 |
|                                  |                                 | ACUF650   | KY033398 |
|                                  |                                 | ACUF766   | KY033431 |
|                                  |                                 | ACUF783   | KY033443 |
|                                  | Biloris (Turkey)                | ACUF653   | KY033400 |
|                                  |                                 | ACUF763   | KY033429 |
|                                  |                                 | ACUF764   | KY033430 |
|                                  |                                 | ACUF735   | KY033422 |
| <i>Galdieria<br/>sulphuraria</i> | Yellowstone National Park (USA) | SAG108.79 | AY119767 |
|                                  | California (USA)                | UTEX2393  | AF233069 |
|                                  | Caserta (Italy)                 | ACUF011   | AY541303 |
|                                  | Los Azufres (Mexico)            | ACUF135   | AY541309 |
|                                  | Benevento (Italy)               | ACUF012   | AY541310 |
|                                  | Solfatara (Italy)               | ACUF017   | AY541306 |
|                                  | Scarfoglio (Italy)              | ACUF018   | AY541304 |
|                                  | Vulcano (Italy)                 | ACUF021   | AY541307 |
|                                  | Ischia (Italy)                  | ACUF015   | AY541305 |
|                                  | Sasso Pisano (Italy)            | SP3-C2    | DQ916749 |
|                                  | Sasso Pisano (Italy)            | SP1-10    | DQ916748 |
|                                  | Monte Rotondo (Italy)           | MR6-C36   | DQ916747 |
|                                  |                                 | MR5-C17   | DQ916746 |
|                                  |                                 | MR4-21    | DQ916745 |
|                                  | Pisciarelli (Italy)             | cloneA12  | AY541313 |
|                                  |                                 | cloneD5   | AY541321 |
|                                  |                                 | cloneD15  | AY541322 |
|                                  |                                 | cloneE11  | AY541324 |
|                                  |                                 | cloneE12  | AY541325 |
|                                  | Gunnhuver (Iceland)             | ACUF381   | KC883808 |
|                                  |                                 | ACUF382   | KC883809 |
|                                  | Landmannalaugar (Iceland)       | ACUF385   | KC883812 |
|                                  |                                 | ACUF386   | KC883813 |
|                                  |                                 | ACUF387   | KC883814 |
|                                  |                                 | ACUF388   | KC883815 |
|                                  | Seltun (Iceland)                | ACUF395   | KC883820 |
|                                  |                                 | ACUF397   | KC883822 |
|                                  |                                 | ACUF398   | KC883973 |
|                                  |                                 | ACUF422   | KC883843 |
|                                  |                                 | ACUF423   | KC883844 |
|                                  |                                 | ACUF424   | KC883845 |
|                                  |                                 | ACUF437   | KC883850 |
|                                  |                                 | ACUF409   | KC883831 |
|                                  |                                 | ACUF448   | KC883860 |
|                                  |                                 | ACUF452   | KC883864 |
|                                  |                                 | ACUF439   | KC883852 |
|                                  |                                 | ACUF454   | KC883866 |

|                           |                       |            |          |
|---------------------------|-----------------------|------------|----------|
|                           |                       | ACUF440    | KC883853 |
|                           |                       | ACUF470    | KC883882 |
|                           |                       | ACUF472    | KC883883 |
|                           |                       | ACUF473    | KC883884 |
|                           |                       | ACUF474    | KC883885 |
|                           |                       | ACUF475    | KC883886 |
|                           |                       | ACUF459    | KC883871 |
|                           |                       | ACUF460    | KC883872 |
|                           |                       | ACUF410    | KC883832 |
|                           |                       | ACUF463    | KC883875 |
|                           |                       | ACUF417    | KC883839 |
|                           |                       | ACUF412    | KC883834 |
|                           | Niasjvellir (Iceland) | ACUF399    | KC883823 |
|                           |                       | ACUF400    | KC883824 |
|                           |                       | ACUF443    | KC883855 |
|                           |                       | ACUF444    | KC883856 |
|                           | Viti (Iceland)        | ACUF461    | KC883873 |
|                           | Güçlükonak (Turkey)   | ACUF658    | KY033403 |
|                           |                       | ACUF725    | KX501175 |
|                           |                       | ACUF768    | KX501178 |
|                           |                       | ACUF781    | KY033441 |
|                           | Germencik (Turkey)    | ACUF778    | KX501181 |
|                           |                       | ACUF674    | KY033412 |
|                           |                       | ACUF676    | KY033413 |
|                           |                       | ACUF779    | KY033440 |
|                           |                       | cloneT02   | KY033449 |
| <i>Galdieria partita</i>  | Kamchatka (Russia)    | IPPAS P500 | AB18008  |
| <i>Galdieria daedala</i>  | Kunashir (Russia)     | IPPAS P508 | AY541302 |
| <i>Galdieria phlegrea</i> | Viterbo (Italy)       | ACUF009    | AY119768 |
|                           | Agrigento (Italy)     | ACUF063    | AY119769 |
|                           | Pisciarelli (Italy)   | ACUF002    | AY541311 |
|                           |                       | cloneB15   | AY541314 |
|                           |                       | cloneB19   | AY541315 |
|                           |                       | cloneB20   | AY541316 |
|                           |                       | cloneC1    | AY541317 |
|                           | Biloris (Turkey)      | ACUF765    | KX501177 |
|                           |                       | ACUF652    | KY033399 |
|                           |                       | ACUF657    | KY033402 |
|                           |                       | ACUF780    | KX501182 |
|                           |                       | ACUF656    | KY033401 |
|                           | Güçlükonak (Turkey)   | ACUF784    | KY033444 |
|                           |                       | cloneT09   | KY033456 |

|                                |                                 |           |          |
|--------------------------------|---------------------------------|-----------|----------|
|                                |                                 | cloneT16  | KX501184 |
|                                | Nemrut (Turkey)                 | ACUF738   | KX501176 |
|                                |                                 | ACUF664   | KY033405 |
|                                | Diyadin (Turkey)                | ACUF667   | KY033407 |
|                                |                                 | ACUF669   | KY033409 |
|                                |                                 | ACUF788   | KY033447 |
|                                |                                 | ACUF771   | KY033434 |
|                                | Cermik (Turkey)                 | ACUF642   | KY033395 |
|                                |                                 | ACUF625   | KY033394 |
|                                |                                 | cloneT07  | KY033454 |
|                                |                                 | cloneT08  | KY033455 |
|                                |                                 | cloneT10  | KY033457 |
|                                |                                 | ACUF668   | KY033408 |
| <i>Cyanidioschyzon merolae</i> | Java (Indonesia)                | ACUF201   | AY119765 |
|                                | Monte Nuovo (Italy)             | ACUF202   | AY541296 |
|                                | Pisciarelli (Italy)             | ACUF001   | AY119766 |
|                                |                                 | cloneA1   | AY541312 |
|                                |                                 | cloneD1   | AY541320 |
|                                |                                 | cloneE10  | AY541323 |
|                                | Biloris (Turkey)                | cloneT01  | KY033448 |
|                                | Nemrut (Turkey)                 | cloneT05  | KY033452 |
|                                |                                 |           |          |
|                                |                                 |           |          |
| <i>Cyanidium caldarium</i>     | Siena (Italy)                   | ACUF019   | AY541297 |
|                                | Java (Indonesia)                | ACUF182   | AY541298 |
|                                | Acqua Santa (Italy)             | ACUF020   | AY541299 |
|                                | Monte Rotondo (Italy)           | MR4-22    | DQ916750 |
|                                |                                 | MR5-5     | DQ916751 |
|                                |                                 | MR6-C35   | DQ916752 |
|                                | Sasso Pisano (Italy)            | SP1-10    | DQ916753 |
|                                | Pisciarelli (Italy)             | cloneC2   | AY541318 |
|                                | Cermik (Turkey)                 | ACUF767   | KY033432 |
|                                | Diyadin (Turkey)                | ACUF775   | KY033437 |
|                                | Güçlükonak (Turkey)             | cloneT17  | KY033462 |
|                                |                                 |           |          |
|                                |                                 |           |          |
| <i>Cyanidium chilense</i>      | Monte Rotaro (Italy)            | sp.19     | AY541300 |
|                                |                                 | sp.20     | AY541301 |
|                                | Terme di baia (Italy)           | sp.21     | KC914876 |
| Cyanidales sp.                 | Yellowstone National Park (USA) | DS1-9     | JQ269631 |
|                                |                                 | DS2-5     | JQ269629 |
|                                |                                 | DS3-1     | JQ269633 |
|                                |                                 | SFFL-5    | JQ269630 |
|                                |                                 | LCATERR-7 | JQ269608 |
|                                |                                 | LCBCEL-5  | JQ269609 |
|                                |                                 | LCBTERR-6 | JQ269612 |
|                                |                                 | CHJ-4     | JQ269635 |
|                                |                                 | CHJ-5     | JQ269634 |
|                                |                                 | DSB-9     | JQ269617 |

|            |          |
|------------|----------|
| DSC-8      | JQ269618 |
| DSD-7      | JQ269605 |
| DSE-8      | JQ269619 |
| DSF-12     | JQ269620 |
| DSH-4      | JQ269606 |
| DS1-6      | JQ269623 |
| DS2-2      | JQ269638 |
| DS3-3      | JQ269624 |
| SFFL-8     | JQ269630 |
| SFFR-7     | JQ269616 |
| LCASUB-11  | JQ269627 |
| LCBCEL-7   | JQ269610 |
| LCBSUB-5   | JQ269628 |
| LCBTERR-12 | JQ269611 |
| LCCBLGR-8  | JQ269613 |
| LCCYEGR-4  | JQ269614 |
| NCB-4      | JQ269621 |
| RIVER1B-5  | JQ269636 |
| SSI-6      | JQ269622 |
| SSII-1     | JQ269626 |
| TS-4       | JQ269637 |

| <b>Outgroups</b>         |   |           |          |
|--------------------------|---|-----------|----------|
| <i>Rhodella</i>          | / | SAG115.79 | AY119776 |
| <i>violacea</i>          |   |           |          |
| <i>Bangiopsis</i>        | / | PR21      | AY119772 |
| <i>subsimplex</i>        |   |           |          |
| <i>Dixoniella grisea</i> | / | SAG39.94  | AY119773 |
| <i>Porphyridium</i>      | / | SAG1380-2 | AY119775 |
| <i>aerugineum</i>        |   |           |          |
