# Supplementary material for: Prevalent pH Controls the Capacity of <em>Galdieria maxima</em> to Use Ammonia and Nitrate as a Nitrogen Source
Source: Preprints.org preprint supplement (doi:10.20944/preprints201910.0092.v1), 2019-10-08
Supplement: Supplementary file 16 [file supplementary]

| Start pH 7   |    | Time 0        | Week 1        | Week 2        | Week 3        | Week 4        | Week 5        | Week 6        |
|--------------|----|---------------|---------------|---------------|---------------|---------------|---------------|---------------|
| IPPAS P507   | OD | 0.343 ± 0.006 | 0.364 ± 0.001 | 0.353 ± 0.001 | 0.312 ± 0.002 | 0.313 ± 0.005 | 0.317 ± 0.001 | 0.372 ± 0.004 |
|              | pH | 7.00 ± 0.02   | 7.01 ± 1.10   | 6.98 ± 0.90   | 7.02 ± 0.60   | 6.97 ± 0.70   | 6.99 ± 0.60   | 7.01 ± 0.50   |
|              |    |               |               |               |               |               |               |               |
| ACUF769      | OD | 0.335 ± 0.006 | 0.277 ± 0.002 | 0.317 ± 0.001 | 0.313 ± 0.005 | 0.360 ± 0.018 | 0.313 ± 0.005 | 0.310 ± 0.001 |
|              | pH | 6.46 ± 0.01   | 6.05 ± 0.11   | 4.76 ± 0.62   | 3.16 ± 0.11   | 2.80 ± 0.08   | 2.52 ± 0.05   | 2.33 ± 0.03   |
|              |    |               |               |               |               |               |               |               |
| ACUF722      | OD | 0.310 ± 0.001 | 0.257 ± 0.054 | 0.313 ± 0.004 | 0.321 ± 0.005 | 0.326 ± 0.002 | 0.325 ± 0.001 | 0.324 ± 0.011 |
|              | pH | 6.50 ± 0.04   | 6.12 ± 0.04   | 4.26 ± 0.13   | 3.05 ± 0.04   | 2.74 ± 0.02   | 2.47 ± 0.01   | 2.25 ± 0.00   |
|              |    |               |               |               |               |               |               |               |
| CloneT18     | OD | 0.326 ± 0.002 | 0.296 ± 0.029 | 0.324 ± 0.001 | 0.355 ± 0.011 | 0.348 ± 0.001 | 0.335 ± 0.006 | 0.332 ± 0.001 |
|              | pH | 6.51 ± 0.09   | 6.29 ± 0.00   | 5.33 ± 0.32   | 3.34 ± 0.16   | 2.81 ± 0.08   | 2.55 ± 0.08   | 2.37 ± 0.06   |
|              |    |               |               |               |               |               |               |               |
| ACUF773      | OD | 0.335 ± 0.006 | 0.340 ± 0.001 | 0.306 ± 0.005 | 0.343 ± 0.006 | 0.303 ± 0.001 | 0.343 ± 0.008 | 0.346 ± 0.001 |
|              | pH | 6.55 ± 0.01   | 5.86 ± 0.04   | 3.39 ± 0.45   | 2.90 ± 0.06   | 2.66 ± 0.03   | 2.44 ± 0.02   | 2.17 ± 0.01   |
|              |    |               |               |               |               |               |               |               |
| ACUF648      | OD | 0.356 ± 0.001 | 0.351 ± 0.005 | 0.352 ± 0.002 | 0.292 ± 0.005 | 0.310 ± 0.001 | 0.303 ± 0.011 | 0.352 ± 0.006 |
|              | pH | 6.38 ± 0.01   | 5.67 ± 0.01   | 3.42 ± 0.06   | 2.81 ± 0.30   | 2.77 ± 0.02   | 2.56 ± 0.04   | 2.420 ± 0.01  |
|              |    |               |               |               |               |               |               |               |
| ACUF731      | OD | 0.321 ± 0.005 | 0.299 ± 0.005 | 0.317 ± 0.020 | 0.364 ± 0.011 | 0.313 ± 0.005 | 0.307 ± 0.006 | 0.356 ± 0.001 |
|              | pH | 6.58 ± 0.04   | 6.48 ± 0.03   | 6.14 ± 0.17   | 4.64 ± 0.00   | 3.00 ± 0.01   | 2.62 ± 0.04   | 2.22 ± 0.06   |
|              |    |               |               |               |               |               |               |               |
| ACUF551      | OD | 0.360 ± 0.006 | 0.328 ± 0.005 | 0.324 ± 0.001 | 0.327 ± 0.005 | 0.313 ± 0.021 | 0.337 ± 0.016 | 0.343 ± 0.006 |
|              | pH | 6.48 ± 0.03   | 6.09 ± 0.13   | 3.54 ± 0.02   | 3.00 ± 0.00   | 2.72 ± 0.03   | 2.40 ± 0.05   | 2.16 ± 0.14   |
|              |    |               |               |               |               |               |               |               |
| Start pH 6.5 |    | Time 0        | Week 1        | Week 2        | Week 3        | Week 4        | Week 5        | Week 6        |
| IPPAS P507   | OD | 0.388 ± 0.006 | 0.462 ± 0.018 | 0.564 ± 0.052 | 0.652 ± 0.068 | 0.721 ± 0.045 | 0.801 ± 0.119 | 1.402 ± 0.136 |
|              | pH | 6.51 ± 0.00   | 6.40 ± 0.06   | 6.33 ± 0.04   | 6.27 ± 0.17   | 6.19 ± 0.14   | 5.98 ± 0.21   | 5.68 ± 0.57   |
|              |    |               |               |               |               |               |               |               |
| ACUF769      | OD | 0.353 ± 0.001 | 0.505 ± 0.094 | 0.738 ± 0.059 | 1.282 ± 0.201 | 1.910 ± 0.144 | 3.930 ± 0.255 | 5.470 ± 0.422 |
|              | pH | 6.46 ± 0.01   | 6.05 ± 0.11   | 4.76 ± 0.62   | 3.16 ± 0.11   | 2.80 ± 0.08   | 2.52 ± 0.05   | 2.33 ± 0.03   |
|              |    |               |               |               |               |               |               |               |
| ACUF722      | OD | 0.365 ± 0.007 | 0.518 ± 0.017 | 0.614 ± 0.023 | 0.827 ± 0.052 | 1.318 ± 0.003 | 1.980 ± 0.035 | 3.055 ± 0.120 |
|              | pH | 6.50 ± 0.04   | 6.12 ± 0.04   | 4.26 ± 0.13   | 3.05 ± 0.04   | 2.74 ± 0.02   | 2.47 ± 0.01   | 2.25 ± 0.00   |

| CloneT18   | OD | 0.372 ± 0.021 | 0.354 ± 0.073 | 0.702 ± 0.006 | 0.748 ± 0.046 | 1.107 ± 0.052 | 2.705 ± 0.134  | 4.020 ± 0.156  |
|------------|----|---------------|---------------|---------------|---------------|---------------|----------------|----------------|
|            | pH | 6.51 ± 0.09   | 6.29 ± 0.00   | 5.33 ± 0.32   | 3.34 ± 0.16   | 2.81 ± 0.08   | 2.55 ± 0.08    | 2.37 ± 0.06    |
| ACUF773    | OD | 0.382 ± 0.001 | 0.735 ± 0.013 | 1.045 ± 0.052 | 1.331 ± 0.064 | 2.042 ± 0.048 | 3.480 ± 0.064  | 5.175 ± 0.120  |
|            | pH | 6.55 ± 0.01   | 5.86 ± 0.04   | 3.39 ± 0.45   | 2.90 ± 0.06   | 2.66 ± 0.03   | 2.44 ± 0.02    | 2.17 ± 0.01    |
| ACUF648    | OD | 0.433 ± 0.003 | 0.545 ± 0.011 | 1.342 ± 0.011 | 2.702 ± 0.054 | 4.830 ± 0.141 | 6.745 ± 0.064  | 11.730 ± 0.099 |
|            | pH | 6.38 ± 0.01   | 5.67 ± 0.01   | 3.42 ± 0.06   | 2.81 ± 0.30   | 2.77 ± 0.02   | 2.56 ± 0.04    | 2.420 ± 0.01   |
| ACUF731    | OD | 0.324 ± 0.004 | 0.184 ± 0.010 | 0.379 ± 0.001 | 0.877 ± 0.002 | 2.214 ± 0.001 | 4.890 ± 0.140  | 14.863 ± 0.614 |
|            | pH | 6.58 ± 0.04   | 6.48 ± 0.03   | 6.14 ± 0.17   | 4.64 ± 0.00   | 3.00 ± 0.01   | 2.62 ± 0.04    | 2.22 ± 0.06    |
| ACUF551    | OD | 0.305 ± 0.028 | 0.721 ± 0.090 | 1.556 ± 0.002 | 2.492 ± 0.001 | 6.910 ± 0.163 | 11.200 ± 0.366 | 17.583 ± 0.738 |
|            | pH | 6.48 ± 0.03   | 6.09 ± 0.13   | 3.54 ± 0.02   | 3.00 ± 0.00   | 2.72 ± 0.03   | 2.40 ± 0.05    | 2.16 ± 0.14    |
| Start pH 6 |    | Time 0        | Week 1        | Week 2        | Week 3        | Week 4        | Week 5         | Week 6         |
| IPPAS P507 | OD | 0.349 ± 0.011 | 0.853 ± 0.033 | 1.568 ± 0.017 | 2.644 ± 0.057 | 4.030 ± 0.057 | 5.845 ± 0.106  | 8.670 ± 0.156  |
|            | pH | 5.88 ± 0.03   | 3.89 ± 0.29   | 3.08 ± 0.15   | 2.77 ± 0.12   | 2.58 ± 0.11   | 2.43 ± 0.11    | 2.25 ± 0.14    |
| ACUF769    | OD | 0.285 ± 0.013 | 0.587 ± 0.024 | 1.266 ± 0.096 | 2.753 ± 0.158 | 6.040 ± 0.003 | 9.640 ± 0.002  | 14.820 ± 0.003 |
|            | pH | 5.83 ± 0.01   | 3.52 ± 0.00   | 2.90 ± 0.02   | 2.58 ± 0.06   | 2.34 ± 0.00   | 2.14 ± 0.02    | 1.84 ± 0.03    |
| ACUF722    | OD | 0.238 ± 0.052 | 0.562 ± 0.011 | 0.856 ± 0.051 | 1.592 ± 0.028 | 2.483 ± 0.152 | 2.818 ± 0.236  | 3.745 ± 0.148  |
|            | pH | 5.81 ± 0.01   | 3.76 ± 0.00   | 2.99 ± 0.13   | 2.68 ± 0.14   | 2.47 ± 0.11   | 2.32 ± 0.09    | 2.10 ± 0.14    |
| CloneT18   | OD | 0.271 ± 0.036 | 0.430 ± 0.045 | 0.636 ± 0.006 | 1.524 ± 0.037 | 3.860 ± 0.071 | 6.673 ± 0.046  | 8.196 ± 0.303  |
|            | pH | 5.86 ± 0.01   | 4.08 ± 0.30   | 3.18 ± 0.08   | 2.81 ± 0.04   | 2.57 ± 0.02   | 2.34 ± 0.03    | 2.16 ± 0.06    |
| ACUF773    | OD | 0.309 ± 0.010 | 0.752 ± 0.003 | 1.263 ± 0.061 | 2.565 ± 0.147 | 4.890 ± 0.268 | 7.500 ± 0.198  | 8.950 ± 0.028  |
|            | pH | 5.79 ± 0.01   | 3.40 ± 0.08   | 2.88 ± 0.06   | 2.65 ± 0.08   | 2.50 ± 0.06   | 2.35 ± 0.08    | 2.33 ± 0.00    |
| ACUF648    | OD | 0.354 ± 0.001 | 0.693 ± 0.063 | 1.769 ± 0.078 | 3.208 ± 0.060 | 4.980 ± 0.014 | 8.140 ± 0.095  | 14.240 ± 0.198 |
|            | pH | 5.65 ± 0.25   | 3.87 ± 0.44   | 3.07 ± 0.09   | 2.84 ± 0.05   | 2.62 ± 0.05   | 2.46 ± 0.04    | 2.30 ± 0.01    |

|              |    |               |               |               |               |               |                |                |
|--------------|----|---------------|---------------|---------------|---------------|---------------|----------------|----------------|
| ACUF731      | OD | 0.322 ± 0.023 | 0.729 ± 0.001 | 1.423 ± 0.086 | 1.947 ± 0.030 | 5.830 ± 0.121 | 9.520 ± 0.409  | 12.310 ± 0.592 |
|              | pH | 6.17 ± 0.71   | 3.61 ± 0.08   | 3.20 ± 0.07   | 2.88 ± 0.07   | 2.67 ± 0.08   | 2.49 ± 0.11    | 2.31 ± 0.12    |
|              |    |               |               |               |               |               |                |                |
| ACUF551      | OD | 0.354 ± 0.003 | 0.574 ± 0.013 | 1.556 ± 0.079 | 2.928 ± 0.040 | 4.230 ± 0.106 | 7.510 ± 0.099  | 13.920 ± 0.283 |
|              | pH | 5.53 ± 0.25   | 3.61 ± 0.01   | 3.02 ± 0.04   | 2.83 ± 0.03   | 2.60 ± 0.03   | 2.43 ± 0.03    | 2.25 ± 0.04    |
|              |    |               |               |               |               |               |                |                |
| Start pH 5   |    | Time 0        | Week 1        | Week 2        | Week 3        | Week 4        | Week 5         | Week 6         |
| IPPAS P507   | OD | 0.367 ± 0.027 | 1.084 ± 0.082 | 2.021 ± 0.096 | 3.605 ± 0.087 | 6.610 ± 0.042 | 16.080 ± 0.146 | 18.240 ± 0.423 |
|              | pH | 5.058 ± 0.04  | 3.13 ± 0.19   | 2.80 ± 0.10   | 2.47 ± 0.13   | 2.32 ± 0.16   | 2.08 ± 0.24    | 2.16 ± 0.00    |
|              |    |               |               |               |               |               |                |                |
| ACUF769      | OD | 0.279 ± 0.030 | 0.401 ± 0.058 | 1.140 ± 0.023 | 1.761 ± 0.055 | 3.705 ± 0.049 | 6.880 ± 0.127  | 11.040 ± 0.170 |
|              | pH | 5.03 ± 0.05   | 3.41 ± 0.01   | 3.04 ± 0.06   | 2.77 ± 0.01   | 2.58 ± 0.01   | 2.42 ± 0.01    | 2.14 ± 0.04    |
|              |    |               |               |               |               |               |                |                |
| ACUF722      | OD | 0.252 ± 0.028 | 0.610 ± 0.008 | 1.191 ± 0.016 | 1.880 ± 0.131 | 2.705 ± 0.167 | 2.602 ± 0.059  | 4.925 ± 0.256  |
|              | pH | 4.88 ± 0.08   | 3.28 ± 0.04   | 2.93 ± 0.02   | 2.54 ± 0.04   | 2.43 ± 0.07   | 2.26 ± 0.03    | 2.16 ± 0.09    |
|              |    |               |               |               |               |               |                |                |
| CloneT18     | OD | 0.366 ± 0.003 | 0.593 ± 0.008 | 1.201 ± 0.064 | 1.751 ± 0.069 | 3.360 ± 0.094 | 6.520 ± 0.072  | 10.960 ± 0.056 |
|              | pH | 4.83 ± 0.004  | 3.71 ± 0.07   | 3.19 ± 0.13   | 2.80 ± 0.11   | 2.56 ± 0.07   | 2.32 ± 0.00    | 2.00 ± 0.01    |
|              |    |               |               |               |               |               |                |                |
| ACUF773      | OD | 0.274 ± 0.010 | 0.860 ± 0.074 | 1.589 ± 0.038 | 3.123 ± 0.011 | 5.980 ± 0.141 | 8.030 ± 0.071  | 13.930 ± 0.042 |
|              | pH | 4.70 ± 0.02   | 3.12 ± 0.03   | 2.81 ± 0.04   | 2.53 ± 0.01   | 2.46 ± 0.03   | 2.24 ± 0.05    | 2.14 ± 0.03    |
|              |    |               |               |               |               |               |                |                |
| ACUF648      | OD | 0.391 ± 0.004 | 1.163 ± 0.033 | 1.902 ± 0.040 | 3.260 ± 0.092 | 5.535 ± 0.021 | 13.760 ± 0.311 | 12.350 ± 0.071 |
|              | pH | 5.03 ± 0.18   | 3.27 ± 0.01   | 2.89 ± 0.08   | 2.75 ± 0.06   | 2.56 ± 0.05   | 2.44 ± 0.05    | 2.28 ± 0.07    |
|              |    |               |               |               |               |               |                |                |
| ACUF731      | OD | 0.321 ± 0.019 | 0.796 ± 0.038 | 1.443 ± 0.126 | 2.718 ± 0.165 | 4.740 ± 0.077 | 7.325 ± 0.357  | 10.523 ± 0.034 |
|              | pH | 4.84 ± 0.23   | 3.44 ± 0.11   | 3.16 ± 0.06   | 2.86 ± 0.07   | 2.69 ± 0.07   | 2.55 ± 0.09    | 2.22 ± 0.02    |
|              |    |               |               |               |               |               |                |                |
| ACUF551      | OD | 0.340 ± 0.001 | 0.810 ± 0.061 | 1.950 ± 0.034 | 2.445 ± 0.118 | 6.010 ± 0.098 | 7.825 ± 0.161  | 14.450 ± 0.576 |
|              | pH | 5.12 ± 0.25   | 3.35 ± 0.05   | 2.94 ± 0.04   | 2.81 ± 0.08   | 2.55 ± 0.08   | 2.40 ± 0.10    | 2.27 ± 0.12    |
|              |    |               |               |               |               |               |                |                |
| Start pH 1.5 |    | Time 0        | Week 1        | Week 2        | Week 3        | Week 4        | Week 5         | Week 6         |
| IPPAS P507   | OD | 0.361 ± 0.004 | 1.002 ± 0.059 | 2.102 ± 0.082 | 3.655 ± 0.168 | 6.925 ± 0.234 | 11.450 ± 0.241 | 19.670 ± 0.268 |
|              | pH | 1.29 ± 0.00   | 1.12 ± 0.01   | 1.24 ± 0.03   | 1.57 ± 0.00   | 1.11 ± 0.05   | 1.06 ± 0.07    | 1.13 ± 0.10    |

|          |    |               |               |               |               |               |                |                |
|----------|----|---------------|---------------|---------------|---------------|---------------|----------------|----------------|
| ACUF769  | OD | 0.396 ± 0.006 | 0.808 ± 0.003 | 1.768 ± 0.032 | 3.228 ± 0.049 | 5.750 ± 0.077 | 7.835 ± 0.070  | 13.420 ± 0.077 |
|          | pH | 1.42 ± 0.00   | 1.23 ± 0.01   | 1.44 ± 0.01   | 1.72 ± 0.01   | 1.26 ± 0.02   | 1.22 ± 0.01    | 1.33 ± 0.04    |
| ACUF722  | OD | 0.383 ± 0.008 | 0.842 ± 0.043 | 1.910 ± 0.088 | 3.475 ± 0.114 | 6.001 ± 0.085 | 8.503 ± 0.005  | 16.240 ± 0.003 |
|          | pH | 1.30 ± 0.00   | 1.13 ± 0.01   | 1.29 ± 0.00   | 1.76 ± 0.04   | 1.12 ± 0.00   | 1.13 ± 0.02    | 1.15 ± 0.01    |
| CloneT18 | OD | 0.405 ± 0.025 | 0.629 ± 0.007 | 1.394 ± 0.059 | 2.234 ± 0.085 | 4.470 ± 0.164 | 7.110 ± 0.159  | 13.910 ± 0.211 |
|          | pH | 1.30 ± 0.02   | 1.10 ± 0.00   | 1.34 ± 0.04   | 1.82 ± 0.02   | 1.14 ± 0.01   | 1.12 ± 0.01    | 1.24 ± 0.01    |
| ACUF773  | OD | 0.382 ± 0.009 | 0.667 ± 0.001 | 1.574 ± 0.062 | 2.873 ± 0.060 | 5.120 ± 0.071 | 6.990 ± 0.078  | 13.070 ± 0.123 |
|          | pH | 1.33 ± 0.04   | 1.12 ± 0.04   | 1.36 ± 0.03   | 1.80 ± 0.11   | 1.17 ± 0.01   | 1.21 ± 0.02    | 1.21 ± 0.01    |
| ACUF648  | OD | 0.404 ± 0.008 | 1.263 ± 0.049 | 2.504 ± 0.034 | 4.218 ± 0.085 | 7.800 ± 0.113 | 13.540 ± 0.221 | 13.910 ± 0.410 |
|          | pH | 1.49 ± 0.01   | 1.38 ± 0.03   | 1.54 ± 0.06   | 1.91 ± 0.02   | 1.30 ± 0.03   | 1.26 ± 0.01    | 1.18 ± 0.05    |
| ACUF731  | OD | 0.394 ± 0.011 | 1.101 ± 0.043 | 2.170 ± 0.096 | 3.505 ± 0.112 | 6.370 ± 0.118 | 9.985 ± 0.206  | 18.660 ± 0.218 |
|          | pH | 1.33 ± 0.01   | 1.18 ± 0.04   | 1.35 ± 0.01   | 1.83 ± 0.11   | 1.19 ± 0.01   | 1.14 ± 0.09    | 1.15 ± 0.016   |
| ACUF551  | OD | 0.401 ± 0.016 | 0.835 ± 0.038 | 1.918 ± 0.025 | 3.965 ± 0.147 | 6.305 ± 0.203 | 9.940 ± 0.363  | 15.860 ± 0.401 |
|          | pH | 1.46 ± 0.01   | 1.49 ± 0.02   | 1.37 ± 0.01   | 1.38 ± 0.01   | 1.47 ± 0.01   | 1.29 ± 0.01    | 1.20 ± 0.04    |
