# Supplementary figures and images for: Prevalent pH Controls the Capacity of <em>Galdieria maxima</em> to Use Ammonia and Nitrate as a Nitrogen Source
Source: Preprints.org preprint supplement (doi:10.20944/preprints201910.0092.v1), 2019-10-08

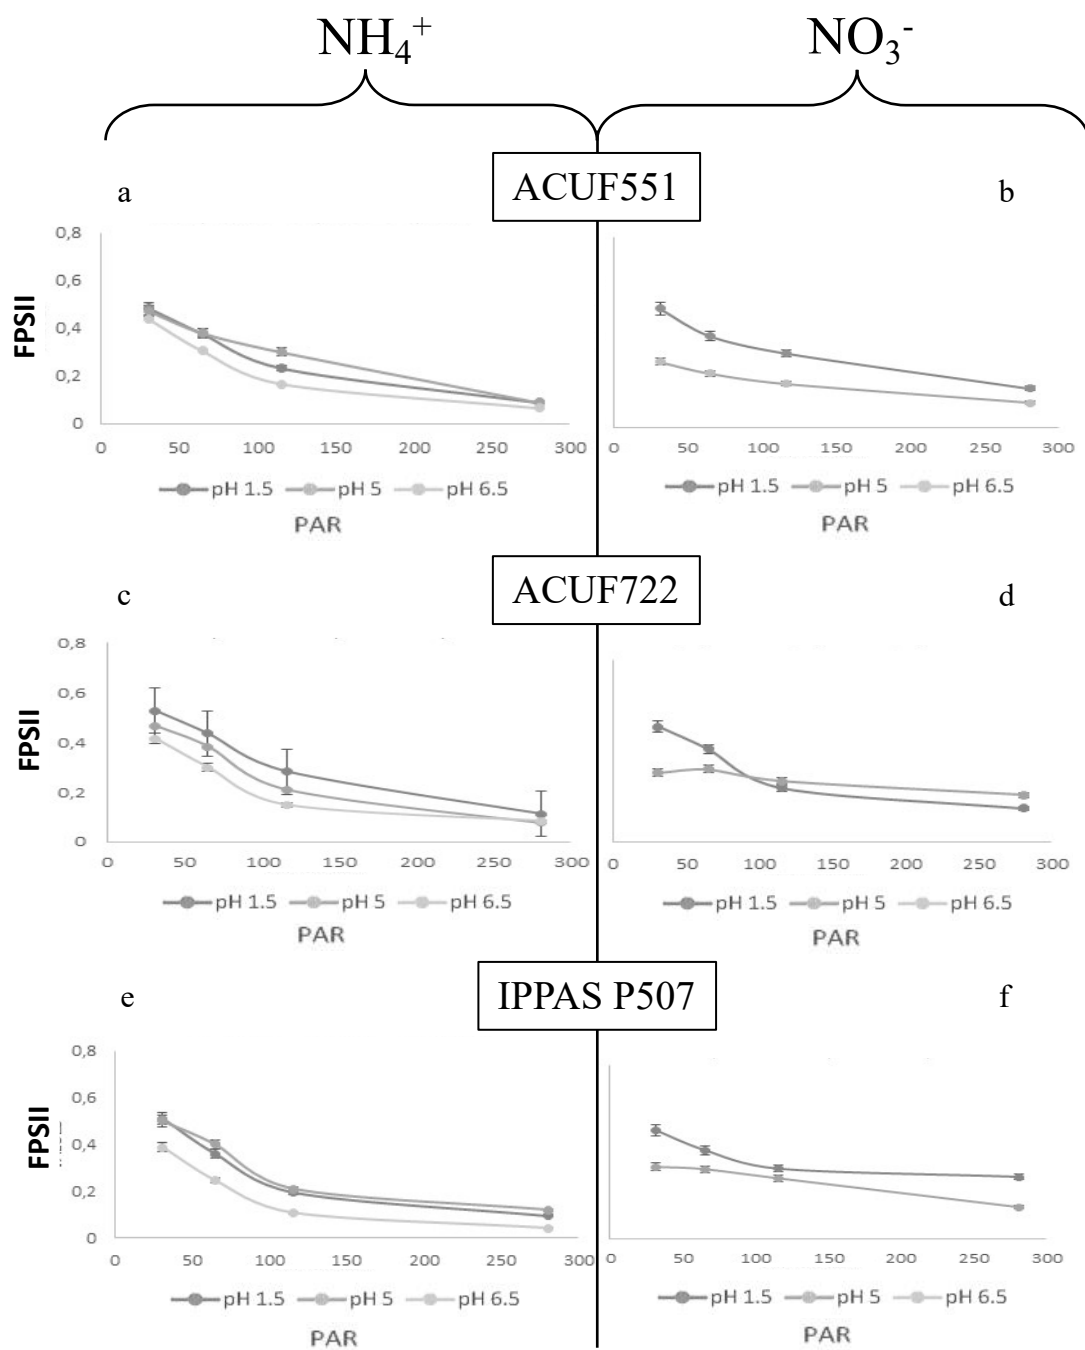

Supplement: Supplementary file 1 [file supplementary]

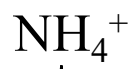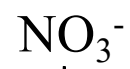

ACUF551

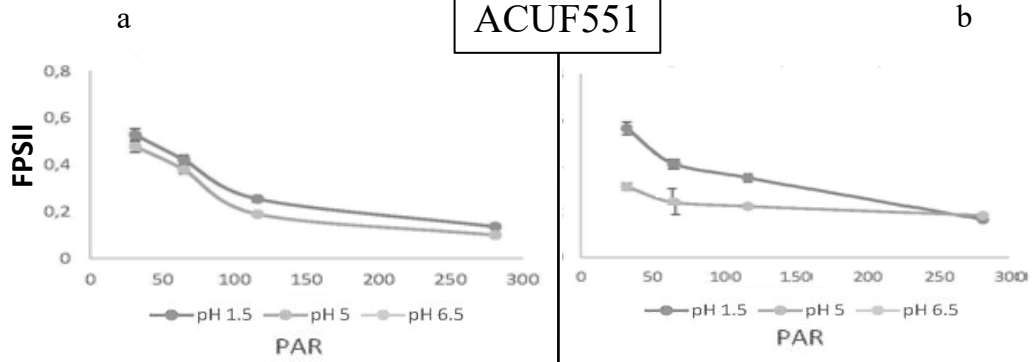

ACUF722

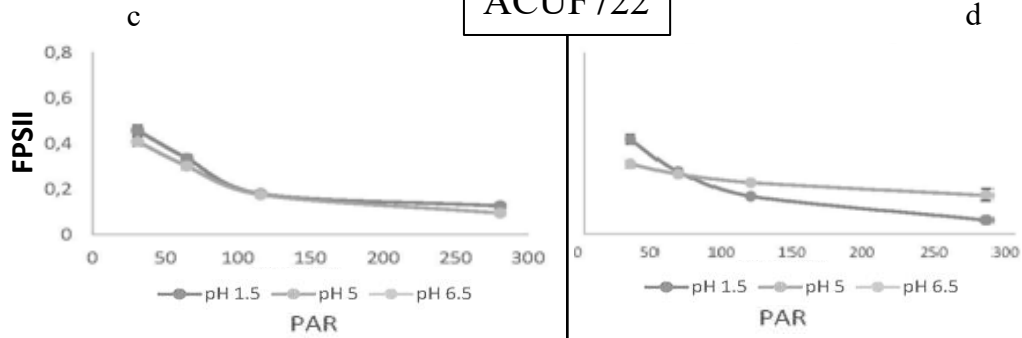

IPPAS P507

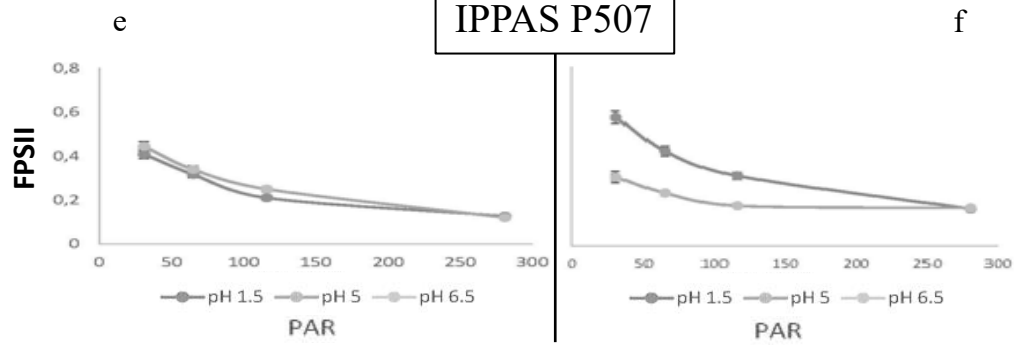

Supplement: Supplementary file 6 [file supplementary]

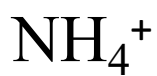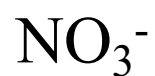

ACUF551

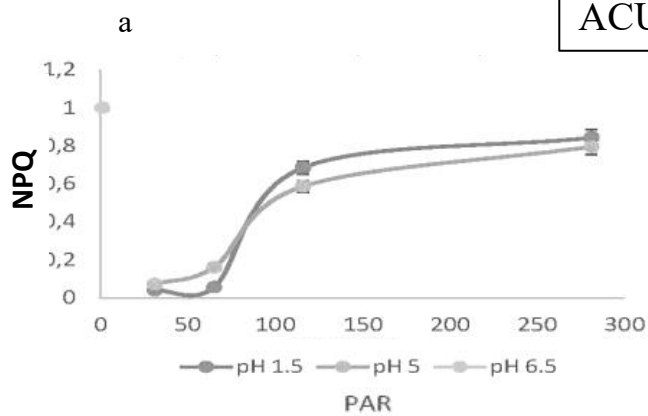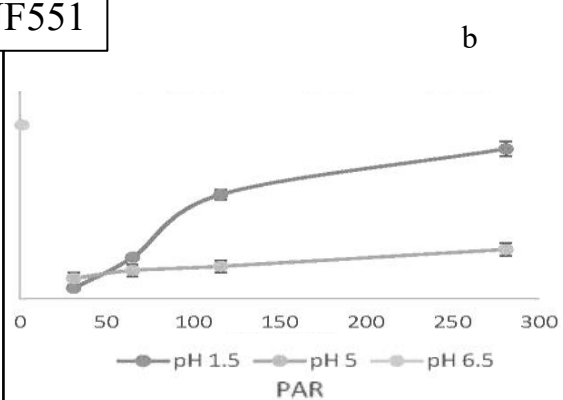

ACUF722

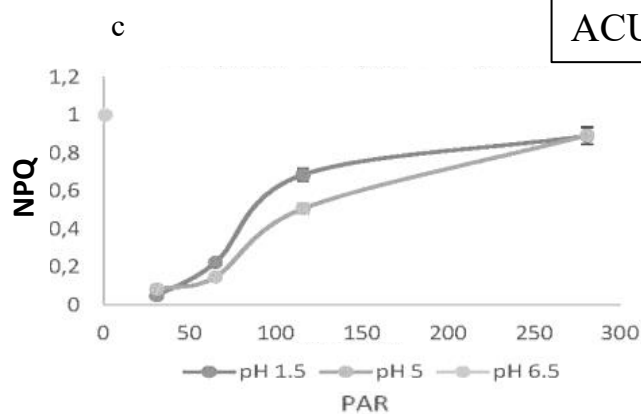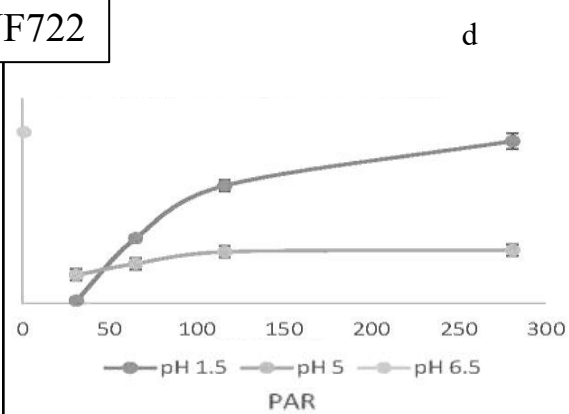

IPPAS P507

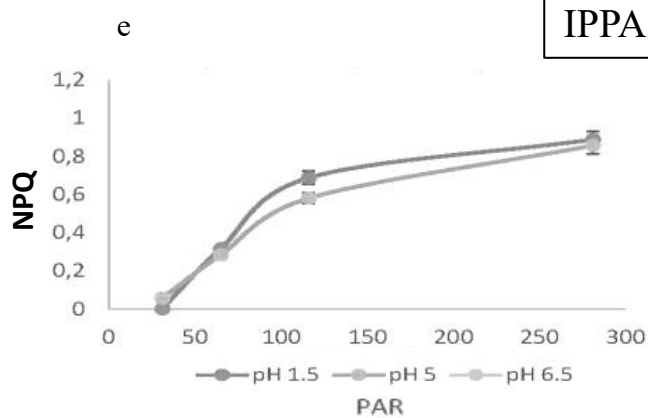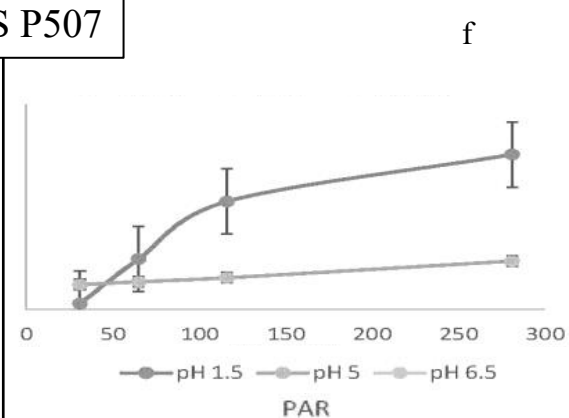

Supplement: Supplementary file 9 [file supplementary]

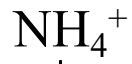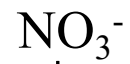

ACUF551

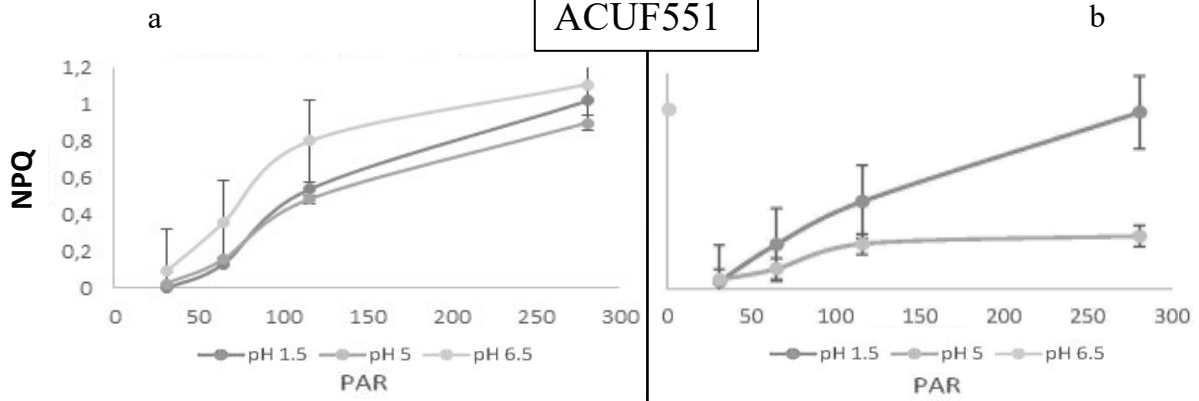

ACUF722

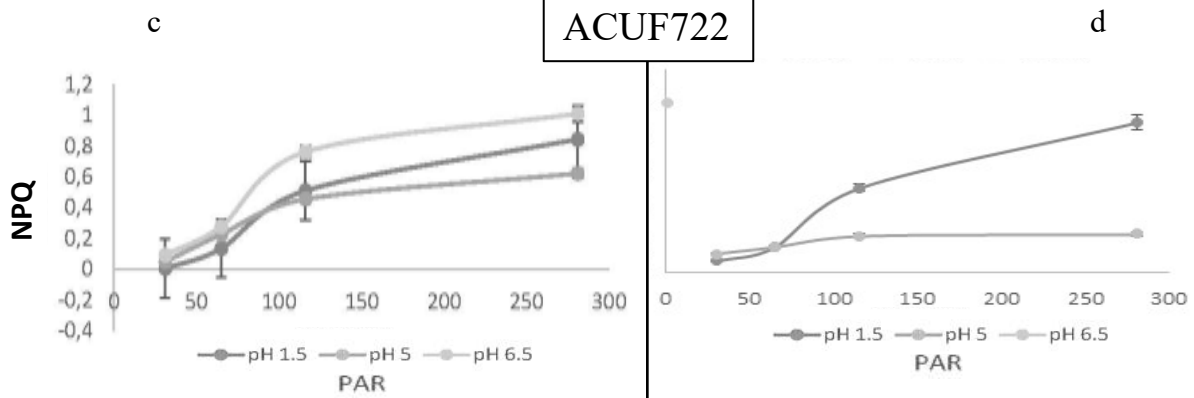

IPPAS P507

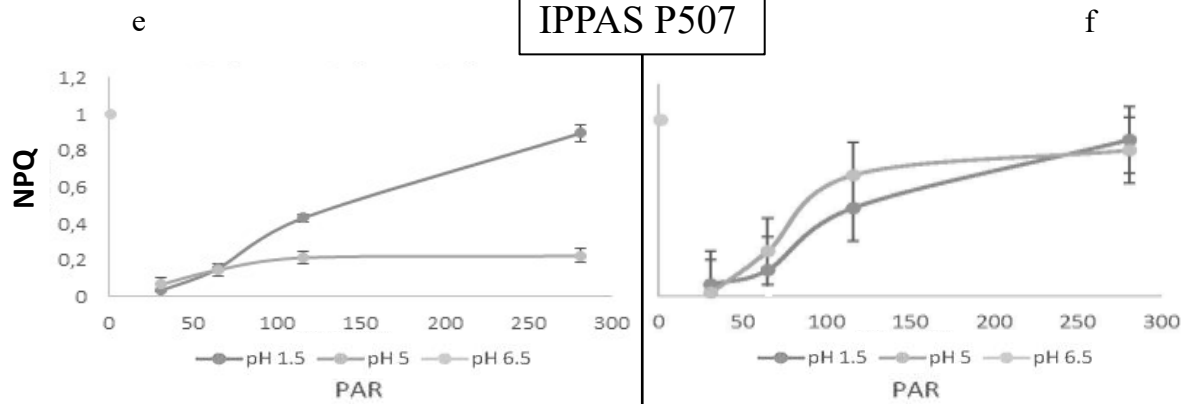

Supplement: Supplementary file 10 [file supplementary]

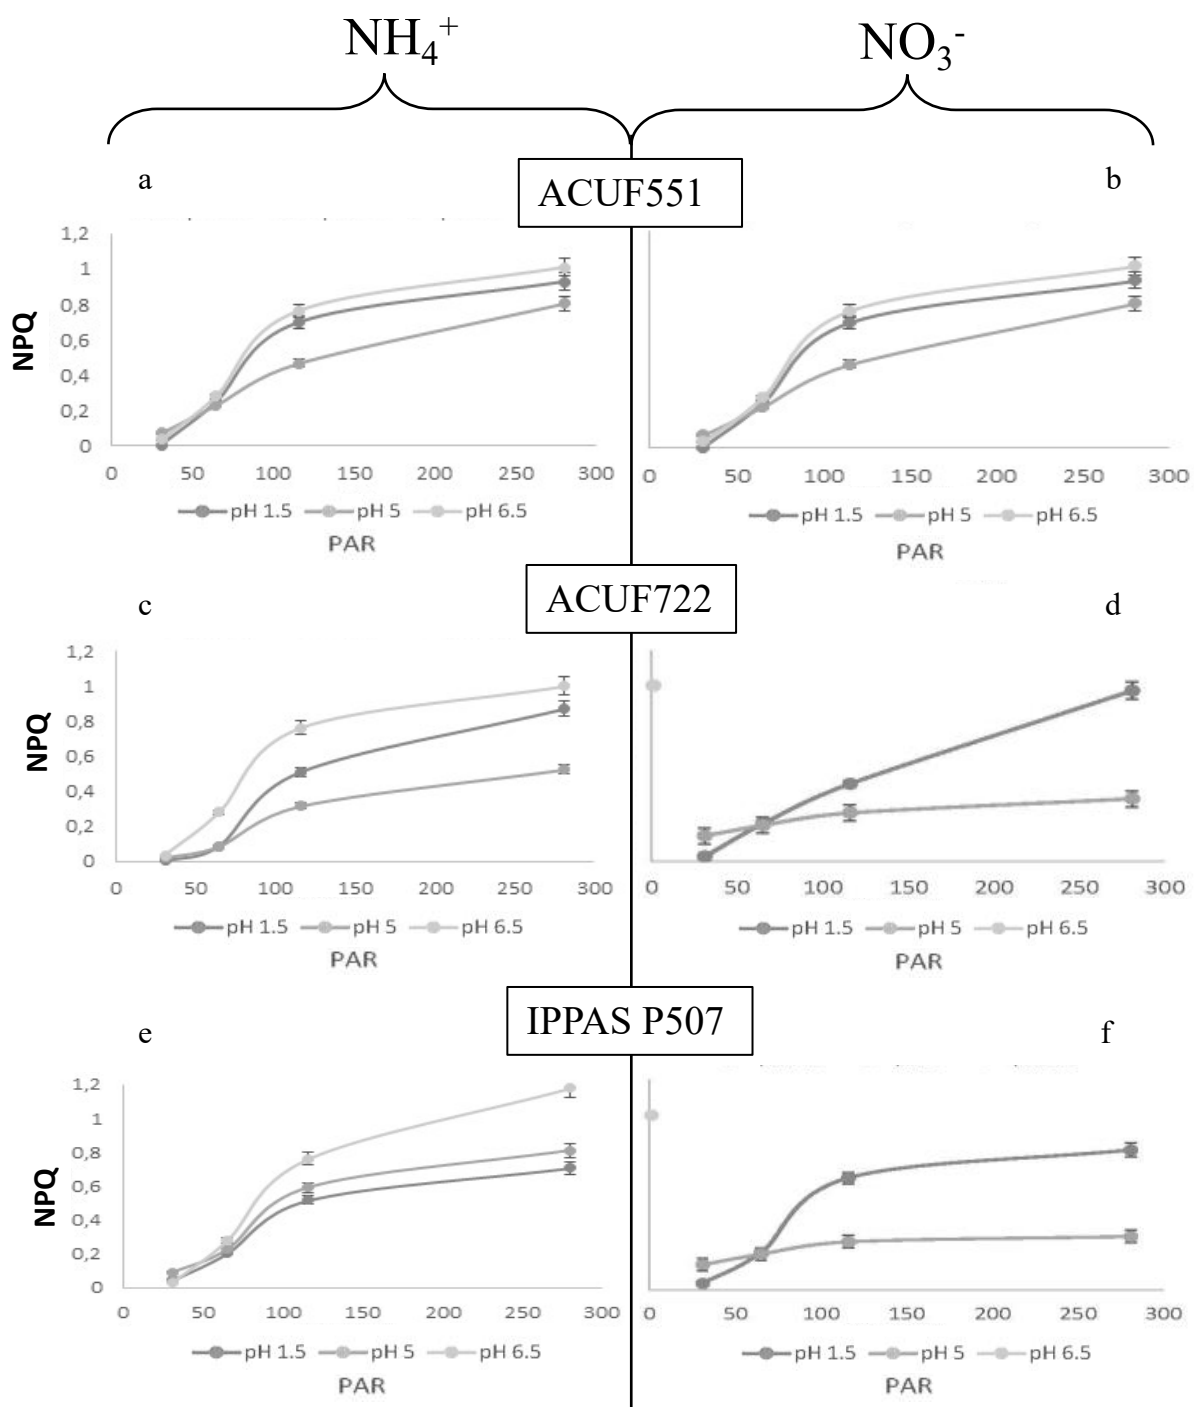

Supplement: Supplementary file 12 [file supplementary]

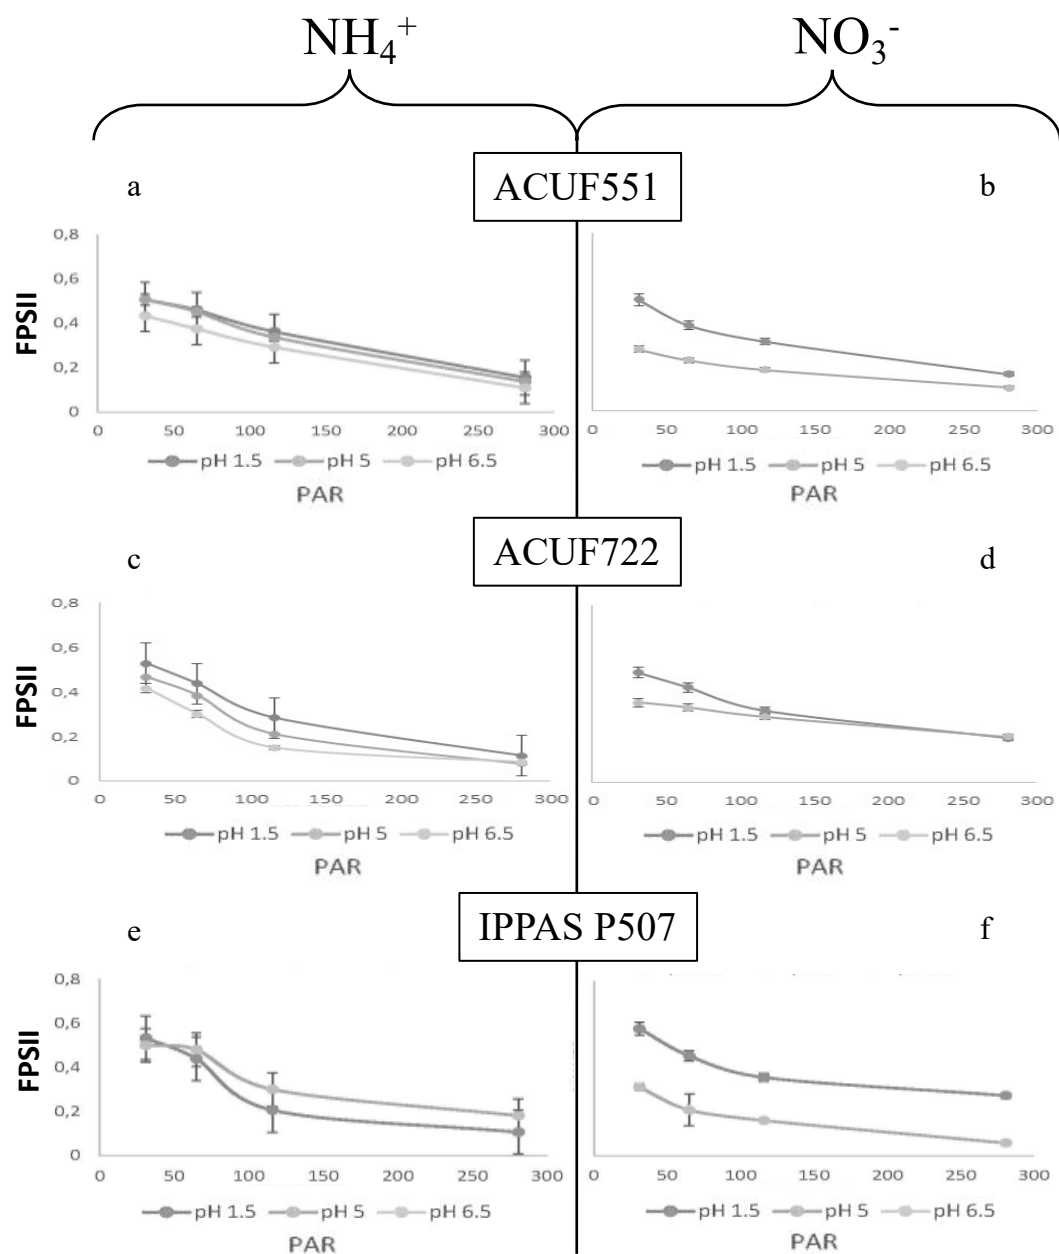

Supplement: Supplementary file 13 [file supplementary]
